# Supplementary material for: Neutralization of CD40 ligand costimulation promotes bone formation and accretion of vertebral bone mass in mice
Source: Oxford University Press journal article supplement (doi:10.1093/rheumatology/kex525), 2018-02-13
Supplement: kex525_rhe-17-0872-file008.docx [file kex525_rhe-17-0872-file008.docx]

**SUPPLEMENTARY DATA**

**Supplementary figure S1. MR1 has no effect on trabecular or cortical bone**

**
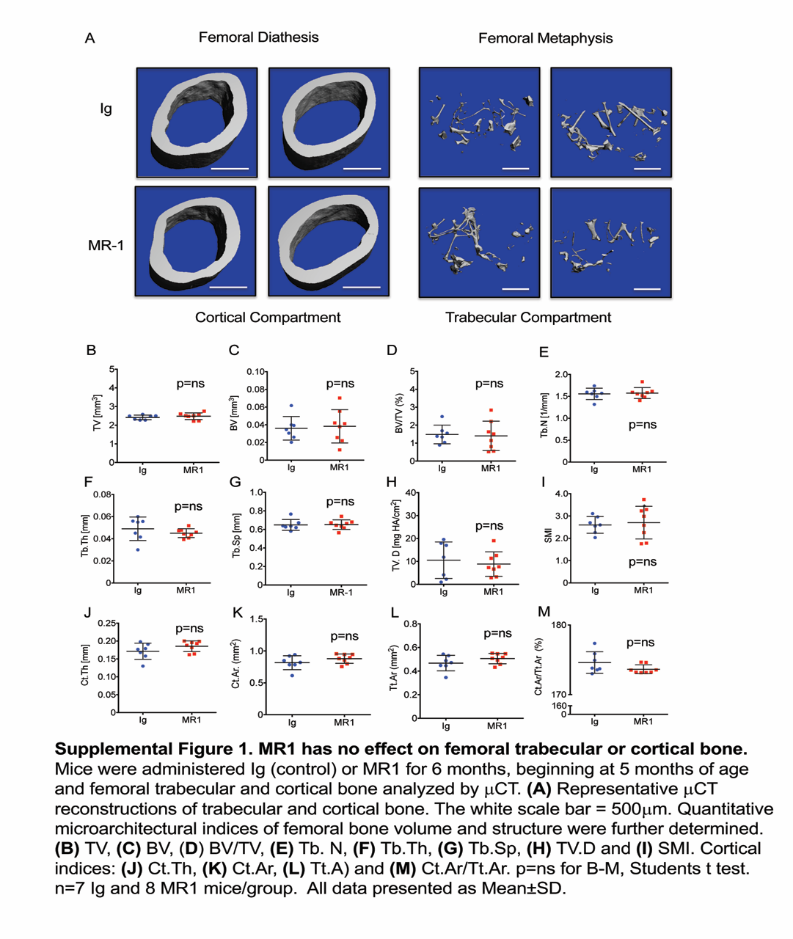
**

Mice were administered Ig (control) or MR1 for 6 months, beginning at 5 months of age and femoral trabecular and cortical bone analysed by µCT. **(A)** Representative µCT reconstructions of trabecular and cortical bone. The white scale bar = 500µm. Quantitative microarchitectural indices of femoral bone volume and structure were further determined. **(B)** TV, **(C)** BV, **(D)** BV/TV, **(E)** Tb.N, **(F)** Tb.Th, **(G)** Tb.Sp, **(H)** TV.D and **(I)** SMI. Cortical indices: **(J)** Ct.Th, **(K)** Ct.Ar, **(L)** Tt.A) and **(M)** Ct.Ar/Tt.Ar. p=ns for B-M, Students t-test. N=7 Ig and 8 MR1 mice/group. All data presented as mean (SD).
